# Supplementary material for: Plasma metabonomics study of rheumatoid arthritis and its Chinese medicine subtypes by using liquid chromatography and gas chromatography coupled with mass spectrometry
Source: Royal Society of Chemistry journal article supplement (doi:10.1039/c2mb25022e), 2012-02-22
Supplement: c2mb25022e.pdf [file c2mb25022e.pdf]

## Supplementary materials

Table S1. Identified significantly changed metabolites between the RA cold pattern and the RA heat pattern.

| Metabolite                              | Fold change <sup>a</sup><br>(heat/cold) | <i>p</i> <sup>b</sup> | Data origin |
|-----------------------------------------|-----------------------------------------|-----------------------|-------------|
| Glycochenodeoxycholic acid <sup>c</sup> | 2.0                                     | 0.025                 | LC/MS       |
| PC 1-acyl 32:1 <sup>c</sup>             | 1.4                                     | 0.03                  | LC/MS       |
| PC 1-acyl 32:0 <sup>c</sup>             | 1.2                                     | 0.009                 | LC/MS       |
| PC 1-acyl 34:1 <sup>c</sup>             | 1.1                                     | 0.004                 | LC/MS       |
| PC 1-acyl 38:5 <sup>c</sup>             | 0.8                                     | 0.049                 | LC/MS       |
| Urea <sup>c</sup>                       | 0.8                                     | 0.016                 | GC/MS       |
| Proline                                 | 1.4                                     | 0.049                 | GC/MS       |
| FFA C18:0                               | 0.9                                     | 0.045                 | GC/MS       |

<sup>a</sup> Fold change was calculated from the mean values of each group. <sup>b</sup> *p* values were calculated from the Student's *t*-test. <sup>c</sup> Potential biomarkers were selected based on the threshold of VIP>1.0 and *p*<0.05.

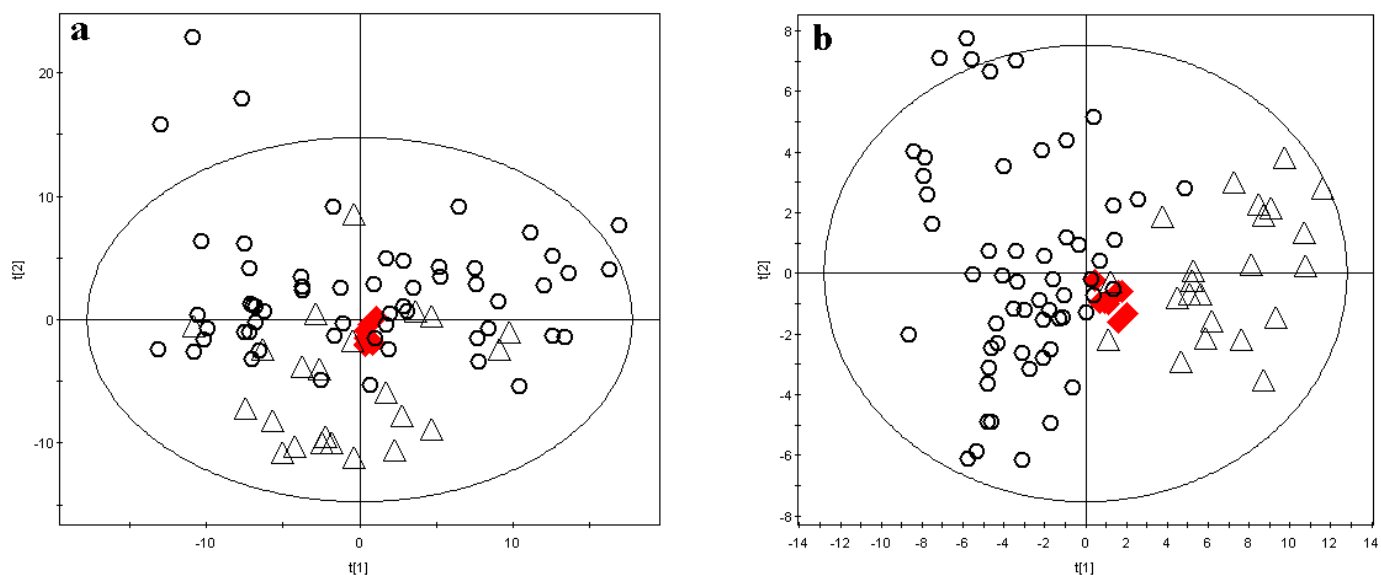

**Figure S1** PCA score plots based on the data from all samples. (a) PCA model generated from LC/MS (8 components,  $R^2X=0.60$ ), (b) PCA model generated from GC/MS (6 components,  $R^2X=0.61$ ). (◆): QCs, (Δ): healthy controls, (○): RA patients.
